# Supplementary material
Source: publisher figshare collection journal article supplement (https://acs.figshare.com/ndownloader/files/34647744)
Supplement: Supplementary file 1 [file 34647744]

## Supporting Information

### Retention time prediction for TMT-labeled peptides in proteomic LC-MS experiments

Benilde Mizero<sup>1</sup>, Carina Villacrés<sup>2</sup>, Victor Spicer<sup>1</sup>, Rosa Viner<sup>3</sup>, Julian Saba<sup>3</sup>, Bhavinkumar Patel<sup>4</sup>, Sergei Snovida<sup>4</sup>, Penny Jensen<sup>4</sup>, Andreas Huhmer<sup>3</sup>, Oleg V. Krokhin<sup>\*1,2,4</sup>

(1) Department of Chemistry, University of Manitoba, Winnipeg, R3T 2N2, Canada

(2) Manitoba Centre for Proteomics and Systems Biology, Winnipeg, R3E 3P4, Canada

(3) Thermo Fisher Scientific, San Jose, California, 95134, USA

(4) Thermo Fisher Scientific, Rockford, Illinois, 61101, USA

(5) Department of Internal Medicine, University of Manitoba, Winnipeg, R3E 3P4, Canada

\*Corresponding Author

Manitoba Centre for Proteomics and Systems Biology

Room 799 John Buhler Research Centre

715 McDermot Avenue

Winnipeg MB R3E 3P4

email: Oleg.Krokhine@umanitoba.ca

phone: 1-204-789-3283

### Supplementary Experimental procedures

**Supplementary Table S1.** Hydrophobicity Index values (HI, %acetonitrile) for standard peptides used for retention time alignment.

**Supplementary Figure S1.** Composition and sequence-dependent features for retention shifts induced by TMTpro labeling. A-C - average retention time shifts for different residues in position #1 for 0 Lys, 1 Lys, and 2 Lys peptides, respectively; D, E – dependence of average retention shifts from peptide hydrophobicity and length.

**Supplementary Figure S2.** Retention time prediction for TMT labeled murine peptides (external data)<sup>37</sup> using non-modified and TMT adjusted SSRCalc model.

**Supplementary Figure S3.** Correlation between experimental retention values for TMT and TMTpro labeled peptides.

**Supplementary Figure S4.** The distribution of SSRCalc predicted hydrophobicity values for *in-silico* digest of human proteome (peptides 6 or more amino acids long and 0 missed cleavages).

## Supplementary Experimental procedures

### Second dimension LC-MS/MS

*The first set of experiments (second dimension RPLC).* An EASY-nLC1000 Liquid Chromatography system (Thermo Fisher Scientific, Waltham, MA), using a Thermo Fisher Scientific™ EASY Spray column (PepMap™, RSLC C18, 2µm, 100Å, 75µm × 50cm, operated at 35°C) was coupled online to a The Thermo Scientific™ QExactive™ HF-X hybrid quadrupole-Orbitrap™ mass spectrometer through EASY spray source interface. Q-Exactive HF-X mass spectrometer was used using following settings: positive ion mode, an MS1 resolution 60,000, AGC target of 1e6, maximum injection time of 45 ms, and a scan range of 350 to 1400 m/z; MS2 settings were 15,000 resolution, AGC target of 1e5, isolation window of 1.4 m/z, and scan range of 200 to 2000 m/z, NCE = 24, 31 and 31 for NL, TMT and TMTpro peptides respectively. MS2 scans were done +2 to +5 charge states. Previously targeted parent ions were excluded for 10 seconds from repetitive MS/MS acquisition.

*The second set of experiments (various columns in the first dimension).* 2D LC Ultra system (Eksigent, Dublin, CA) was used, delivering buffers A and B through a 100µm x 200mm analytical column packed with 3 µm Luna C18(2) (Phenomenex, Torrance, CA) at 500nL/min flow rate. Samples we loaded on a 300 µm x 5 mm PepMap 100 trap-column (Thermo Fisher). The gradient program consisted of following steps: a linear increase from 0.5 to 35% buffer B (acetonitrile) in 49 minutes, 3 minutes at 80% B and then 8 minutes at 0.5% B for column equilibration (60 min total analysis time). Both eluents A (water) and B (acetonitrile) contained 0.1% formic acid. Data-dependent acquisition using a TripleTOF5600 mass spectrometer (Sciex, Concord, ON) in standard MS/MS mode was used. The following settings were applied: 250 ms survey MS spectra (m/z 370-1500) followed by up to 20 MS/MS measurements on the most intense parent ions (300 counts/sec threshold, +2 through +5 charge state, m/z 100-1500 mass range for MS/MS, 100 ms each). Previously targeted parent ions were excluded for 12 seconds from repetitive MS/MS acquisition.

**Supplementary Table S1.** Hydrophobicity Index values (HI, % acetonitrile) for standard peptides used for retention time alignment.

| Peptide                                                                     | Sequence       | Retention time (min)* | HI (% ACN)* |
|-----------------------------------------------------------------------------|----------------|-----------------------|-------------|
| University of Manitoba P1-P6 standards <sup>1</sup>                         |                |                       |             |
| P2                                                                          | LGGGGGGDFR     | 27.79                 | 3.88        |
| P3                                                                          | LLGGGGDFR      | 38.73                 | 7.85        |
| P4                                                                          | LLLGGDFR       | 51.46                 | 12.48       |
| P5                                                                          | LLLLDFR        | 65.86                 | 17.72       |
| P6                                                                          | LLLLLDFR       | 74.02                 | 20.68       |
| Pierce™ LC-MS/MS system suitability standard mix (Thermo Fisher Scientific) |                |                       |             |
| TF1                                                                         | GISNEGQNASIK   | 26.15                 | 3.28        |
| TF2                                                                         | IGDYAGIK       | 34.33                 | 6.25        |
| TF3                                                                         | TASEFDSAIAQDK  | 40.41                 | 8.46        |
| TF4                                                                         | ELGQSGVDTYLQTK | 47.41                 | 11.01       |
| TF5                                                                         | SFANQPLEVVYSK  | 52.68                 | 12.92       |
| TF6                                                                         | LTILEELR       | 57.22                 | 14.58       |
| TF7                                                                         | ELASGLSFPVGFK  | 64.71                 | 17.3        |

\* - measurements for 35 °C column temperature.

Krokhin, O. V.; Spicer, V., Peptide retention standards and hydrophobicity indexes in reversed-phase high-performance liquid chromatography of peptides. *Anal Chem* **2009**, 81, (22), 9522-30.

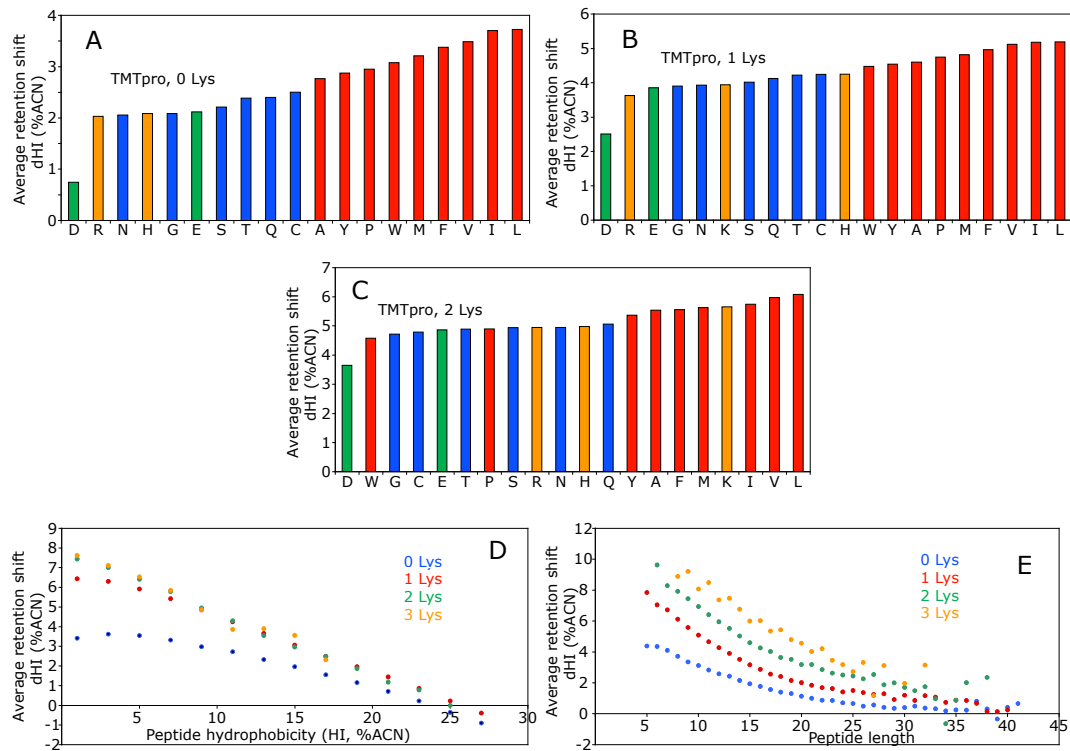

**Supplementary Figure S1.** Composition and sequence dependent features driving RT shifts upon TMTpro labeling. A-C - average retention time shifts for different residues in position #1 for 0 Lys, 1 Lys, and 2 Lys peptides, respectively; D, E – dependence of average retention shifts from peptide hydrophobicity and length.

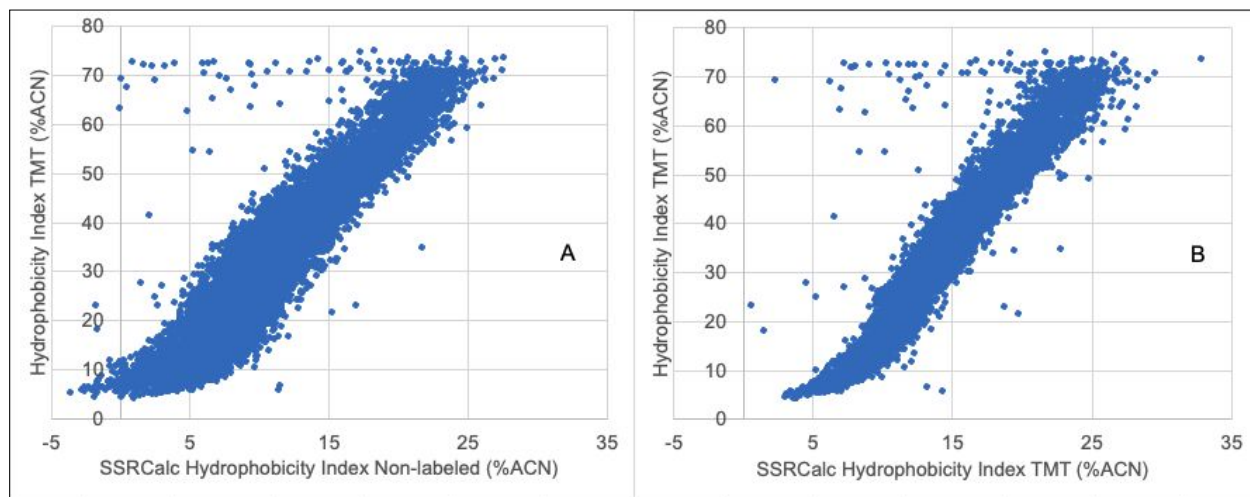

**Supplementary Figure S2.** Retention time prediction for TMT labeled murine peptides (external data) using non-modified (A) and TMT adjusted (B) SSRCalc model. Retention data information from a single 2D fraction was used to generate these plots (from Popow, O.; Liu, X.; Haigis, K. M.; Gygi, S. P.; Paulo J. A., A Compendium of Murine (Phospho)Peptides Encompassing Different Isobaric Labeling and Data Acquisition Strategies *J Proteome Res* **2021**, 20, (7), 3678–3688.).

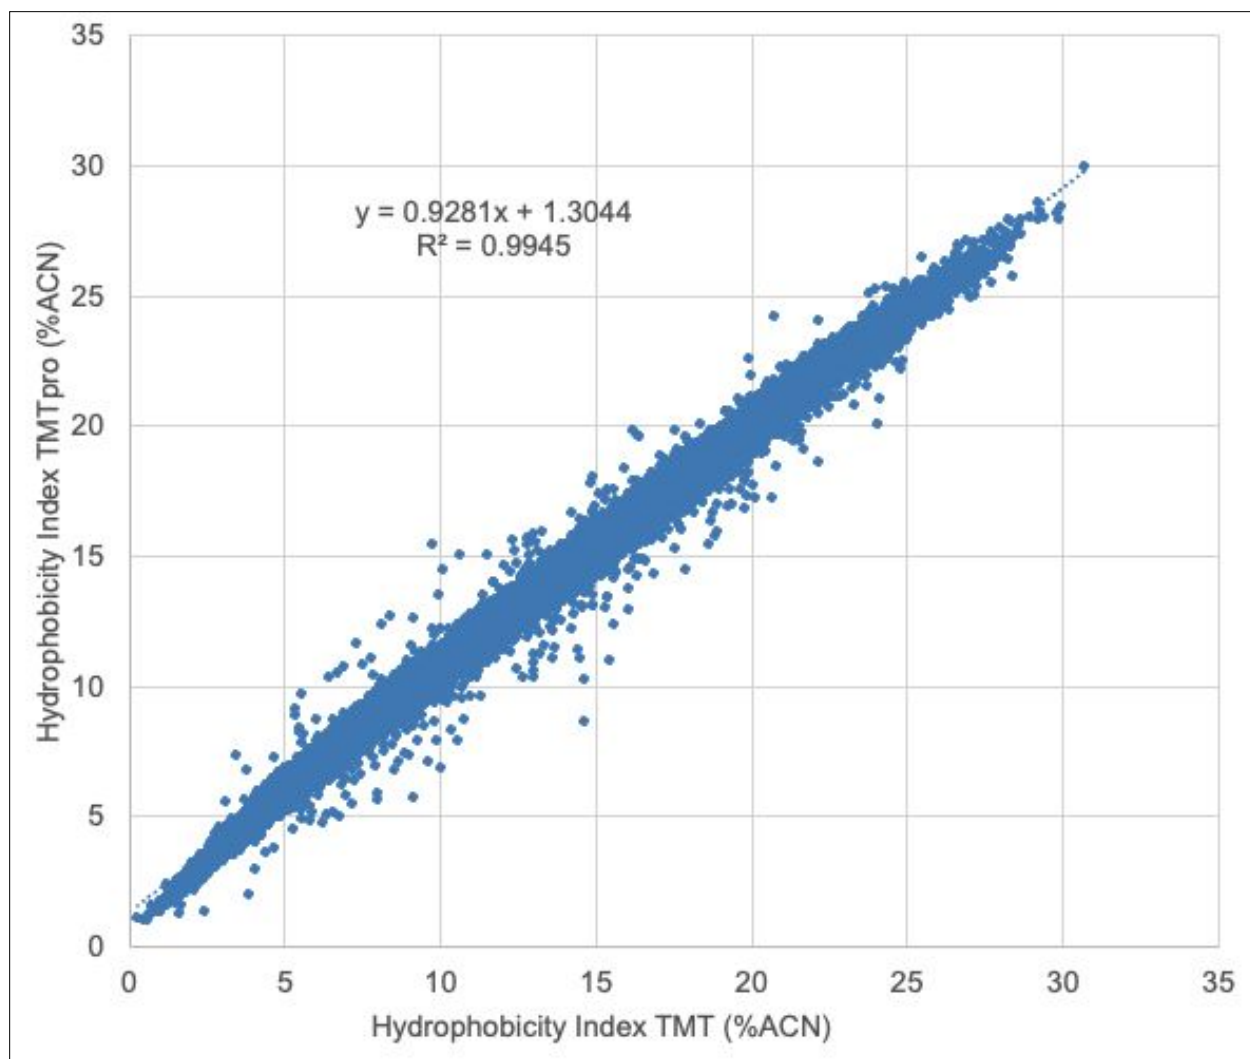

**Supplementary Figure S3.** Correlation between experimental retention values for TMT and TMTpro labeled peptides. (96895 peptides found in both TMT and TMTpro formats).

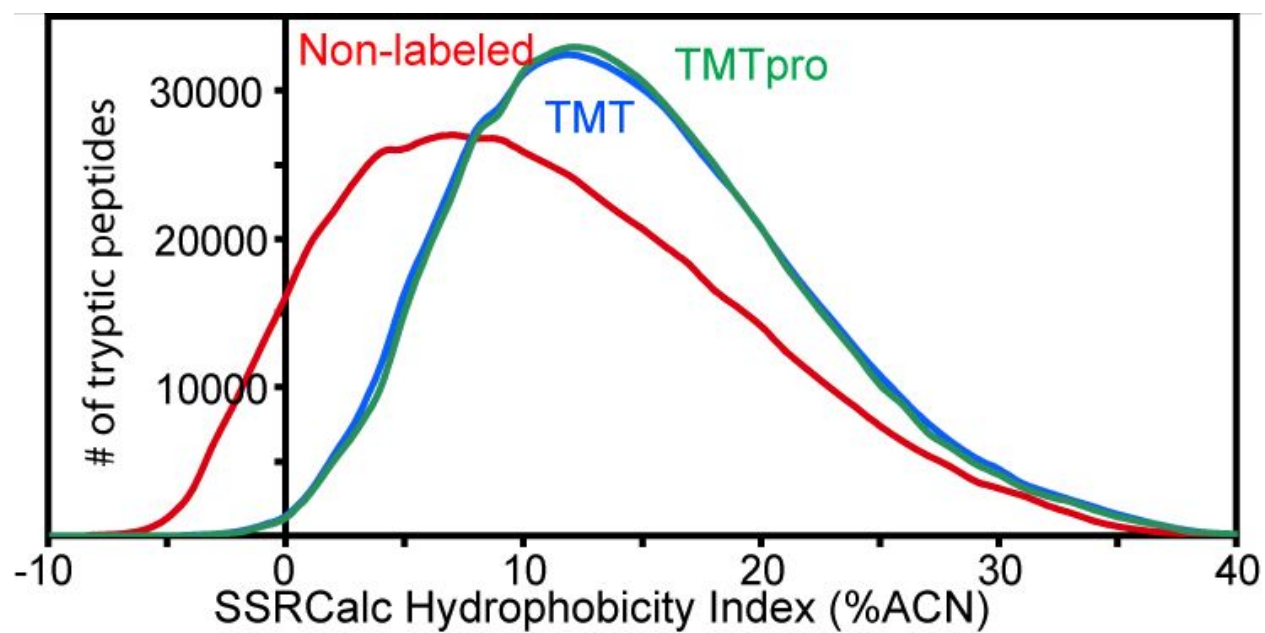

**Supplementary Figure S4.** The distribution of SSRCalc predicted hydrophobicity values for *in-silico* digest of human proteome (peptides 6 or more amino acids long and 0 missed cleavages).
